# Supplementary material for: Molecular Dynamics Simulations Study of the Interactions between Human Dipeptidyl-Peptidase III and Two Substrates
Source: MDPI journal article supplement (doi:10.3390/molecules26216492), 2021-10-27
Supplement: s1 [file s1]

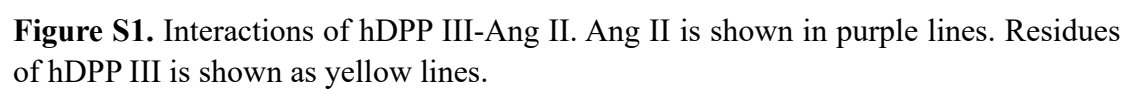

**Figure S1.** Interactions of hDPP III-Ang II. Ang II is shown in purple lines. Residues of hDPP III is shown as yellow lines.

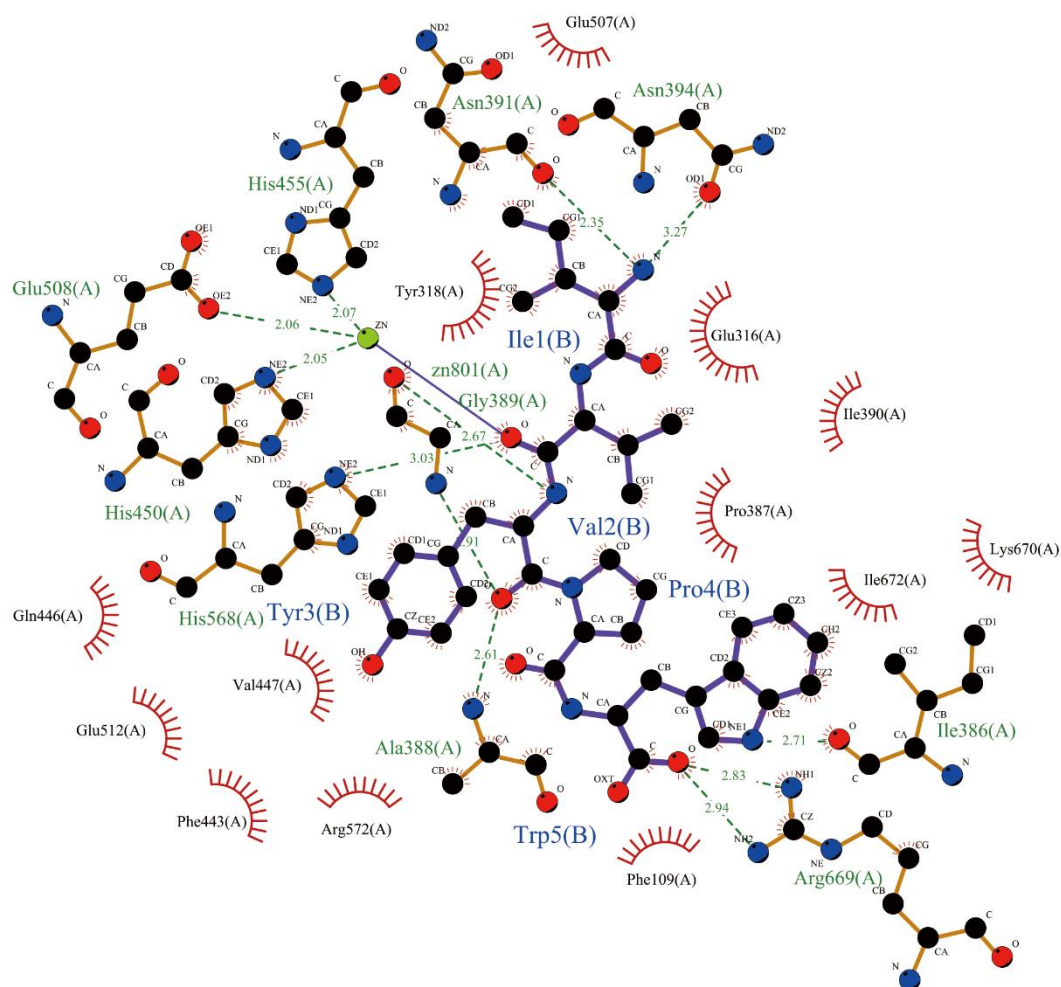

**Figure S2.** Interactions of hDPP III-IVYPW. IVYPW is shown in purple lines. Residues of hDPP III is shown as yellow lines.

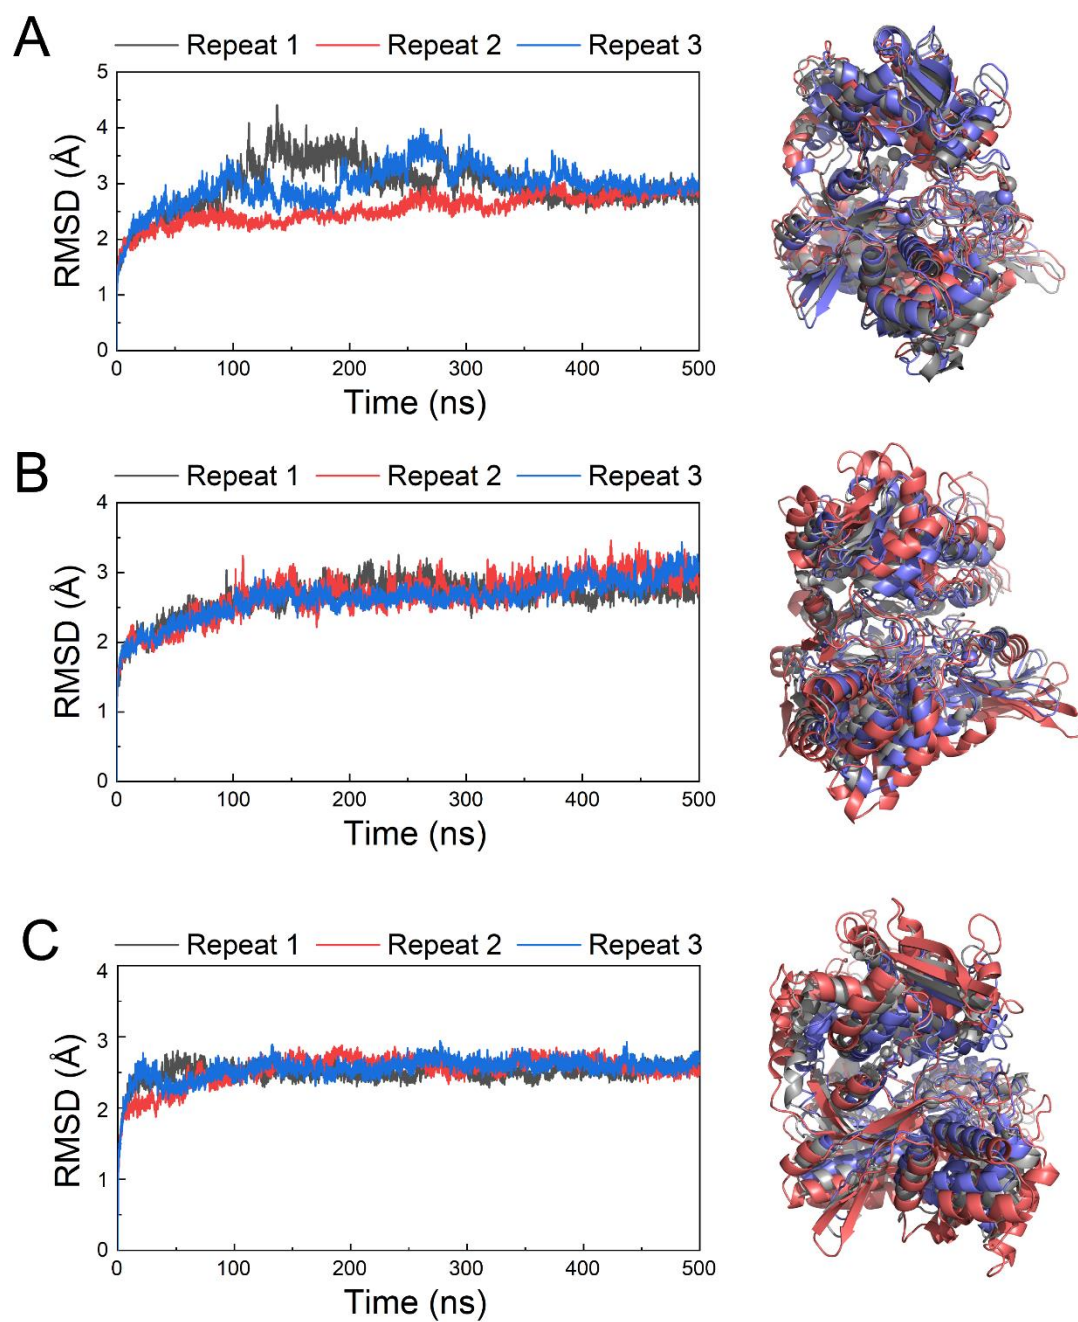

**Figure S3.** RMSD values and the aligned average structures of three systems during 500 ns MD simulations.

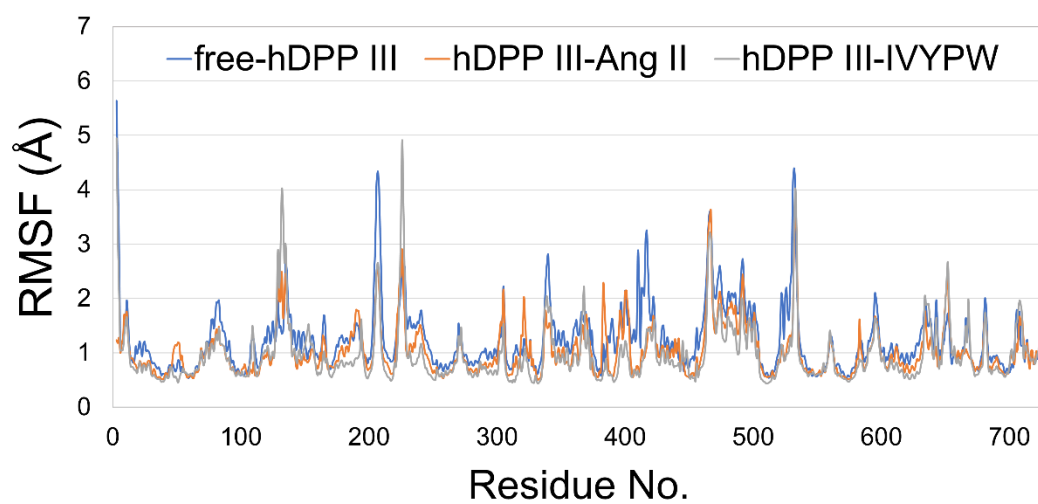

**Figure S4.** RMSF plots of three systems.

**Table S1. Residues contained in each subsite.**

| Subsite No. | Residues                                                                                       |
|-------------|------------------------------------------------------------------------------------------------|
| S2          | Glu316, Ile390, Asn391, Ile392, Asn394, Asp396, Arg399, His455, Asp496, Ser504, Glu507, Glu508 |
| S1          | Tyr318, Glu329, Phe381, Pro387, Gly389, Ile390, His450, Glu508, His568                         |
| S1'         | Pro387, Ala388, GLy389, Phe443, Gln446, Val447, His450, Glu512, His568                         |
| S2'         | Phe109, Tyr318, Pro387, Ala388, Phe443, His568, Arg572                                         |
| S3'         | Ile386, Pro387, Ala388, Val412, Ala416, Phe443, Arg669, Lys670, Ile672                         |

**Table S2. The probability of secondary structures of residue Arg421-Lys423 in three repetitions.**

|                |             | Free-hDPP III   |      | hDPP III-Ang II |      | hDPP III-IVYPW  |      |
|----------------|-------------|-----------------|------|-----------------|------|-----------------|------|
|                | Residue     | $\alpha$ -helix | Loop | $\alpha$ -helix | Loop | $\alpha$ -helix | Loop |
| <b>Group 1</b> | <b>R421</b> | 0.39            | 0.61 | 0.81            | 0.19 | 0.35            | 0.47 |
|                | <b>E422</b> | 0.39            | 0.61 | 0.81            | 0.19 | 0.35            | 0.45 |
|                | <b>K423</b> | 0.39            | 0.57 | 0.81            | 0.18 | 0.35            | 0.62 |
| <b>Group 2</b> | <b>R421</b> | 0.48            | 0.51 | 0.71            | 0.28 | 0.15            | 0.65 |
|                | <b>E422</b> | 0.48            | 0.52 | 0.71            | 0.29 | 0.15            | 0.85 |
|                | <b>K423</b> | 0.48            | 0.50 | 0.71            | 0.19 | 0.15            | 0.62 |
| <b>Group 3</b> | <b>R421</b> | 0.53            | 0.40 | 0.67            | 0.33 | 0.56            | 0.43 |
|                | <b>E422</b> | 0.53            | 0.47 | 0.67            | 0.33 | 0.56            | 0.44 |
|                | <b>K423</b> | 0.53            | 0.46 | 0.67            | 0.31 | 0.56            | 0.43 |
